# Supplementary material for: MicroRNA750-3p Targets Processing of Precursor 7 to Suppress Rice Black-Streaked Dwarf Virus Propagation in Vector Laodelphax striatellus
Source: MDPI journal article supplement (doi:10.3390/v16010097), 2024-01-08
Supplement: s1 [file s1]

**Table S1. Primers used in this research**

| Primer Name  | Sequence                                            |
|--------------|-----------------------------------------------------|
| miR750-3p-RT | GTCGTATCCAGTGCAGGGTCCGAGGTATTCGCACTGGATACGACTTTAGCT |
| miR750-3p-F  | GCGCCCAGATCTAACTCTTCCA                              |
| miR-R        | CAGTGCAGGGTCCGAGGTAT                                |
| RBSDV P10-qF | GCCCCACGTTGCATCTTC                                  |
| RBSDV P10-qR | TGTTGGGCAAAGTGCTAGTTTC                              |
| CDPK-qF      | TTGGAAGTGGTGCCTTTTCG                                |
| CDPK-qR      | GTCCGCTTGGTAGACTCACT                                |
| Neur-qF      | AGACCCATGAAGACCACTCG                                |
| Neur-qR      | ATACAACCTCGCCCGAAC                                  |
| Trans qF     | GTCGTCAACTGGAGGCTACT                                |
| Trans qR     | GATGTTCTGCTCGACGTGAC                                |
| HSP60 qF     | GGCGTTGACATTCTTGCTGA                                |
| HSP60 qR     | ATCTTGAACCAATCTCGCGC                                |
| POP-qF       | CCTAACTGCTTTCATCGGCC                                |
| POP-qR       | GAGTCGGCTGCTTGGTTATG                                |
| dsPOP-F      | TAATACGACTCACTATAGG GATCCCATTTTGGATATT              |
| dsPOP-R      | TAATACGACTCACTATAGG AGGCCCAAATCGCAGTT               |
| dsGFP-F      | TAATACGACTCACTATAGGCGACTTCTTCAAGTCCGCCA             |
| dsGFP-R      | TAATACGACTCACTATAGGCTCAGGTAGTGGTTGTCGGG             |
